# Supplementary material
Source: PubMed Central journal article supplement (PMC6486444)
Supplement: NIHMS1524572-supplement-1.pdf [file NIHMS1524572-supplement-1.pdf]

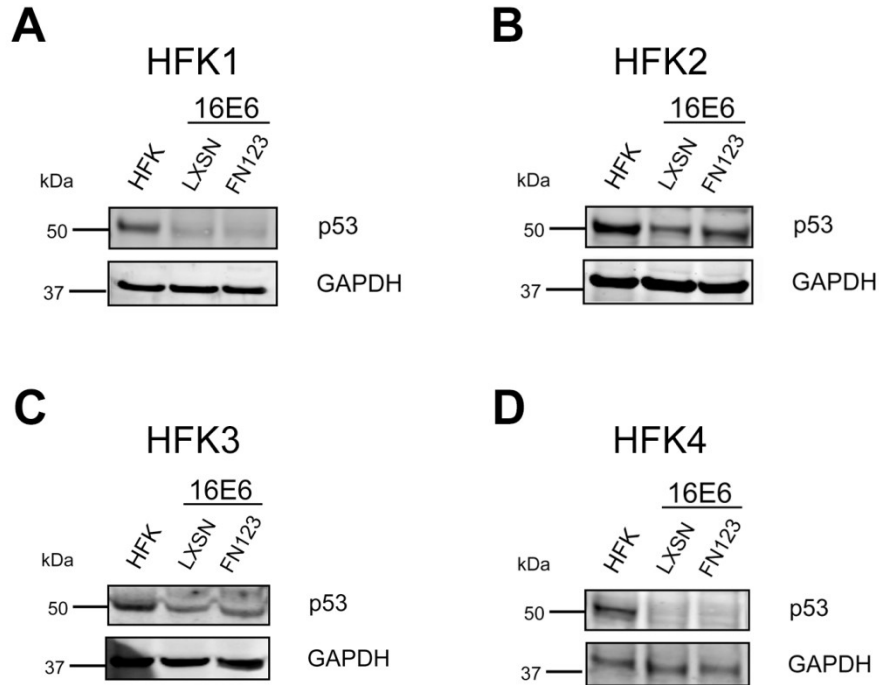

**Supplementary Figure 1. Degradation of p53 in 16E6 HFKs.** Shown are the four biologically independent HFK cell lines that were used throughout this study. Protein levels of p53 were assessed by Western blot in HFKs, HFKs transduced with 16E6 and vector control (LXSN), and HFKs transduced with 16E6 and FLAG-tagged NFX1-123 overexpression construct (FN123). GAPDH was used as a loading control. When compared to HFKs not expressing 16E6, there were decreased levels of p53 in all 16E6/LXSN and 16E6/FN123 cells.
